# Supplementary material for: Co-assembling FRET nanomedicine with self-indicating drug release
Source: Royal Society of Chemistry journal article supplement (doi:10.1039/c8cc06792a), 2018-01-01
Supplement: c8cc06792a1.pdf [file c8cc06792a1.pdf]

## Electronic Supplementary information

### Co-assembling FRET nanomedicine with self-indicating drug release

Yang Li<sup>a#</sup>, Jiao Zhu<sup>b#</sup>, Tianyi Kang<sup>a</sup>, Yuwen Chen<sup>a</sup>, Yu Liu<sup>a</sup>, Yulan Huang<sup>a</sup>, Yi Luo<sup>a,c</sup>, Meijuan Huang<sup>b</sup>, Maling Gou<sup>a\*</sup>

<sup>a</sup> Department of Biotherapy, State Key Laboratory of Biotherapy and Cancer Center, West China Hospital, Sichuan University, Chengdu, 610041, China. E-mail: [goumaling@scu.edu.cn](mailto:goumaling@scu.edu.cn)

<sup>b</sup> Department of Thoracic Oncology, Cancer Center, West Chinsa Hospital, Medical School, Sichuan University, Chengdu, 610041, China.

<sup>c</sup> Department of Orthopedics, West China Hospital, Sichuan University, Chengdu, 610041, China.

# author contributed equally to this work.

\*Corresponding author: Maling Gou ([goumaling@scu.edu.cn](mailto:goumaling@scu.edu.cn))

#### Experimental Section

##### Materials and animals

Oleic acid (OA) was obtained from Sigma-Aldrich. 2,2-Dithiodiethanol and dicyclohexylcarbodiimide (DCC) were purchased from Alfa Aesar (MA, USA). 4-dimethylaminopyridine (DMAP) and triphosgene were purchased from Adamas Reagent (China). Camptothecin (CPT), curcumin (Cur) and Dithiothreitol (DTT) were purchased from MEILUN Biology Technology Co., LTD. (Dalian, China). The DSPE-mPEG<sub>2000</sub> was purchased from Lipoid GmbH (Ludwigshafen, Germany). All solvents used in this study were analytical grade.

Male BALB/c mice (6–8 weeks old) were purchased from the Laboratory Animal Center of Sichuan University (Chengdu, China). All animal procedure was conducted in compliance with the guidelines of Institutional Animal Care and Treatment Committee of Sichuan University, which oversees conformity with national law (Animal Welfare Act). Mice were humanely treated and all animal procedures were approved by the Institutional Animal Care and Treatment Committee of Sichuan University.

##### Synthesis of CPT-etcSS-OA, Cur-etcSS-OA and CPT-hec-OA

CPT-etcSS-OA and CPT-hec-OA were synthesized as described in our previous report<sup>1</sup>.

For synthesis of Cur-etcSS-OA, the OA-etcSS-OH (100 mg) and DMAP (2.0 molar eq.) was dissolved in 10 ml anhydrous dichloromethane (DCM) at 0 °C under nitrogen. Triphosgene (0.35 molar eq.) in the anhydrous DCM was then added dropwise, and the solution was stirred at 0 °C for 10 min. Cur (1.0 molar equiv.) was then added into the solution, and reaction was performed at room temperature overnight. The solution was then evaporated to dryness, and Cur-etcSS-OA was purified by silica gel column chromatography (~yield 30 %).

##### Preparation of nanoaggregates of CPT-NAs, Cur-NAs and CPT-Cur-NAs

CPT-etcSS-OA nanoaggregates (CPT-NAs) and Cur-etcSS-OA nanoaggregates (Cur-NAs) were prepared according to the nanoprecipitation method. Briefly, CPT-etcSS-OA (or Cur-etcSS-OA) and DSPE-mPEG<sub>2000</sub> (10 % versus lipophilic prodrugs) was co-dissolved in the ethanol, which were dispersed dropwise into distilled water under the vigorous agitation.

Cur-etcSS-OA was co-assembled with CPT-etcSS-OA and CPT-hec-OA using the above procedure, thus to obtain the CPT-Cur-NAs of CPT-etcSS-OA and CPT-hec-OA, respectively.

##### Characterization of nanoaggregates

The size and size distribution were measured using Zetasizer (Nano-ZS90, Malvern, England) at 25 °C. Transmission electron microscopy (TEM, JEM-1200EX, Japan) was utilized to observe the morphology of nanoaggregates. Samples were stained with 2 % uranyl acetate. Colloidal stability of CPT-Cur-NAs was investigated by measuring their particle sizes in water stored at 37 °C for 48 h.

##### FRET measurements

The emission spectra of the CPT-NAs, Cur-NAs, mixed solution of CPT-NAs and Cur-NAs,

51 and CPT-Cur-NAs and were determined by a fluorescence spectrometer (Thermo varioskan flash,  
52 Thermo scientific). For FRET measurements, nanoaggregates were loaded in a 96-well plate, and  
53 was excited at 362 nm with the band-pass of 5 nm. The emission spectra were recorded in 2 nm  
54 intervals from 380 to 600 nm.

### 55 Intracellular monitoring/imaging drug release using FRET

56 Colorectal cancer cells (CT26) were purchased from American Type Culture Collection  
57 (Rockville, MD, USA). CT26 cells were maintained in RPMI 1640 containing 10 % FBS, penicillin  
58 (100 units/ml) and streptomycin (100 µg/ml) in a humidified atmosphere of 5 % CO<sub>2</sub> at 37 °C. To  
59 monitor the intracellular drug release from CPT-OA conjugates, CT-26 (10<sup>5</sup>) were seeded into 35  
60 mm microscopy dishes, incubated at 37 °C for 24 h, and then incubated with CPT-Cur-NAs of CPT-  
61 etcSS-OA and CPT-hec-OA at an equivalent CPT concentration of 5 µg/ml for 5 min, 30 min, 2 h  
62 and 6 h, respectively. Cells were then rinsed with PBS five times and fixed in 4 % paraformaldehyde.  
63 The fixed cells were examined using a confocal laser scanning microscope (CLSM, Nikon,  
64 ECLIPSE, Ti2) with excitation at 405 nm to capture CPT fluorescence.

### 65 Intracellular drug release detected by HPLC

66 To quantitatively determine the CPT release from the prodrug within cells, the CT 26 cells were  
67 exposed to the CPT-NAs of CPT-etcSS-OA and CPT-hec-OA at CPT equivalent doses of 5 µg/ml  
68 at 37 °C for 6 h. The medium was then removed and cells were washed with cold PBS five times.  
69 300 µl methanol (containing 1 % acetic acid) was added to each well. The cell lysate was centrifuged  
70 at 10,000 rpm for 10 min, and 20 µl of the supernatant was injected to HPLC system for analysis.

### 71 Cytotoxicity Assay

72 The cell viability was assessed by MTT assay. Briefly, CT26 cells were seeded in a 96-well  
73 plate at a density of approximate 5000 cells per well. After 24 h of growth, the medium was  
74 exchanged for the medium that contained CPT-Cur-NAs of CPT-etcSS-OA and CPT-hec-OA at  
75 various concentrations. The cell was further incubated for 48 h, and these without any treatment  
76 were utilized as control.

### 77 Monitoring drug release in the tissue homogenates using FRET

78 A subcutaneous model of colorectal cancer was established by subcutaneously injecting CT26  
79 cell (2 × 10<sup>6</sup> cells per 100 µl) into the right axillary flank region of male BALB/C mice. When the  
80 tumor grew to around 500 mm<sup>3</sup>, the mice were sacrificed. Blood was collected and centrifuged to  
81 obtain plasma, and the tumor, spleen, heart, lung, liver and kidney were excised. Organs were rinsed  
82 in normal saline and dried with the tissue paper to remove excess fluid. All these plasma and tissue  
83 samples were stored at 80 °C.

84 Mouse tissues (100 mg) were weighed, mixed with 300 µl saline, then homogenized using a  
85 tissue homogenizer. Then, CPT-Cur-NAs of CPT-etcSS-OA and CPT-hec-OA were supplemented  
86 with 100 µl of plasma and various tissue homogenates at the final CPT equivalent concentration of  
87 10 µg/ml in the a 96-well plate. The plate was incubated at 37 °C and measured at the given time  
88 interval using the FRET measurement as described above.

89

### 90 Supporting Figures

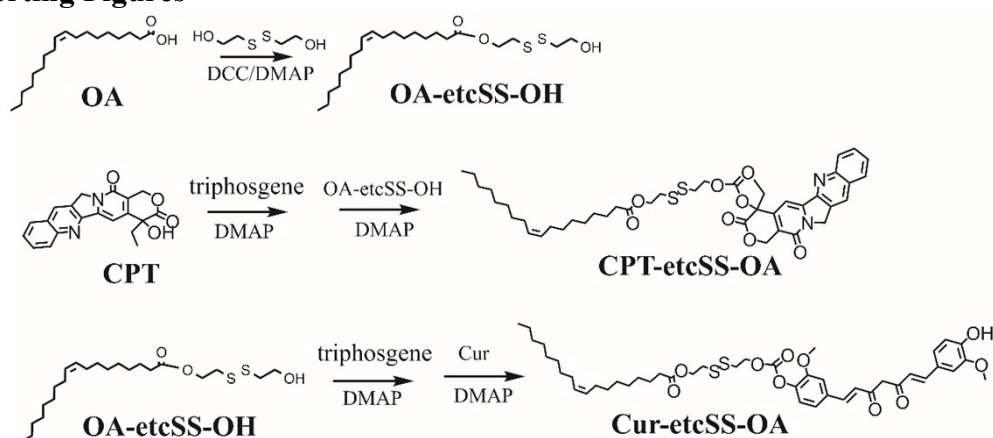

91

92

93

94

Fig.S1 Synthesis of CPT-etcSS-OA and Cur-etcSS-OA.

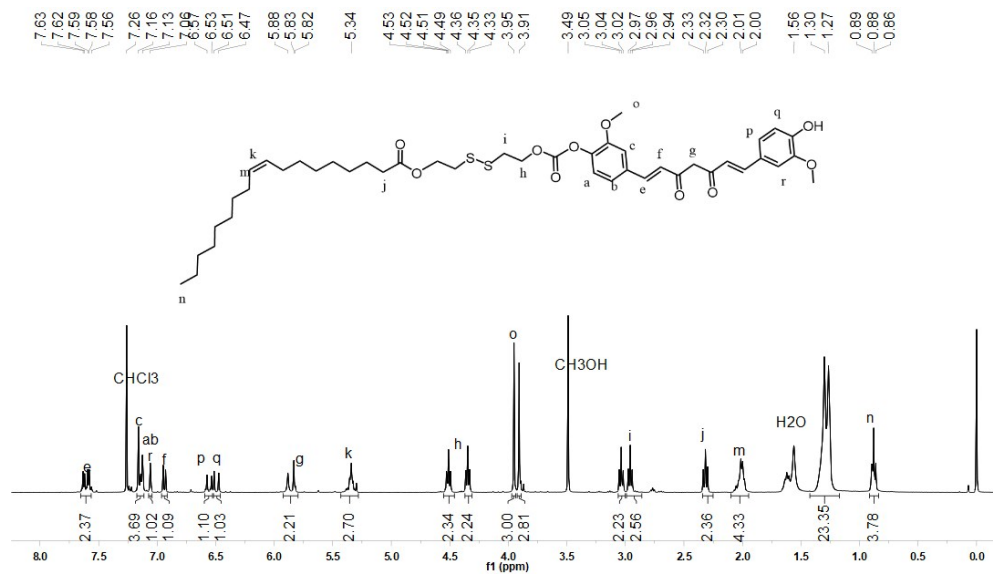

95  
96

Fig.S2 <sup>1</sup>H NMR spectrum of the Cur-etcSS-OA

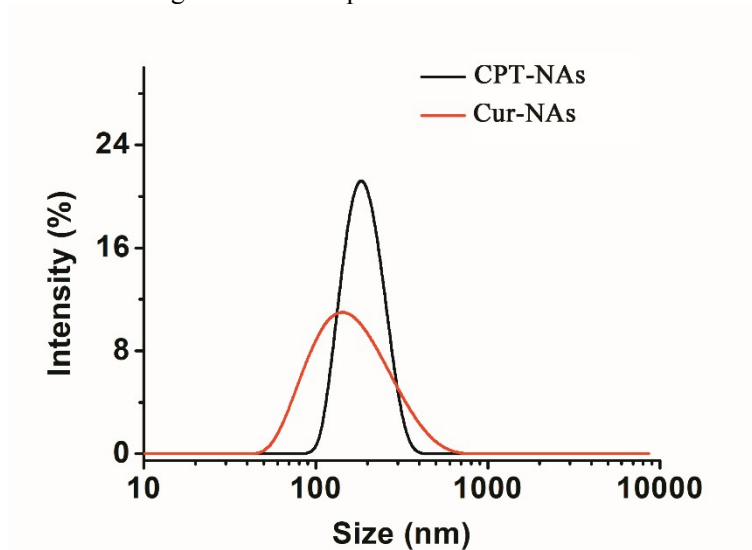

97  
98

Fig.S3 Size distribution of CPT-NAs and Cur-NAs.

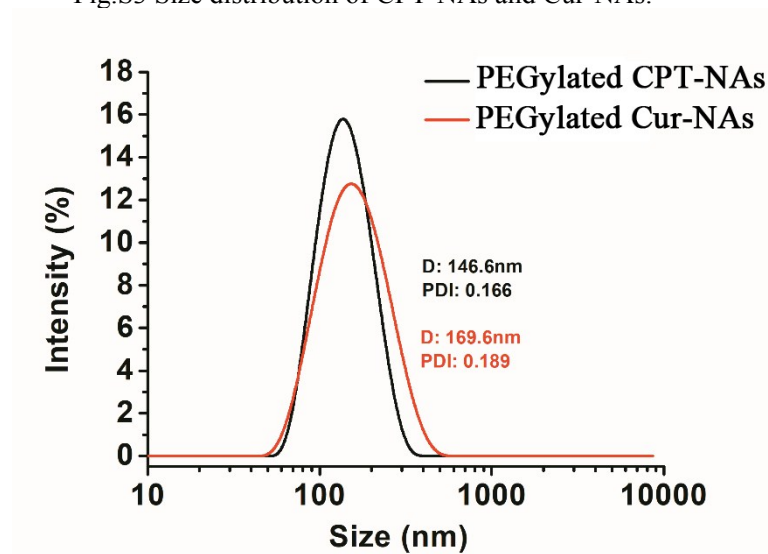

99  
100  
101  
102

Fig.S4 Size distribution of PEGylated CPT-NAs and Cur-NAs.

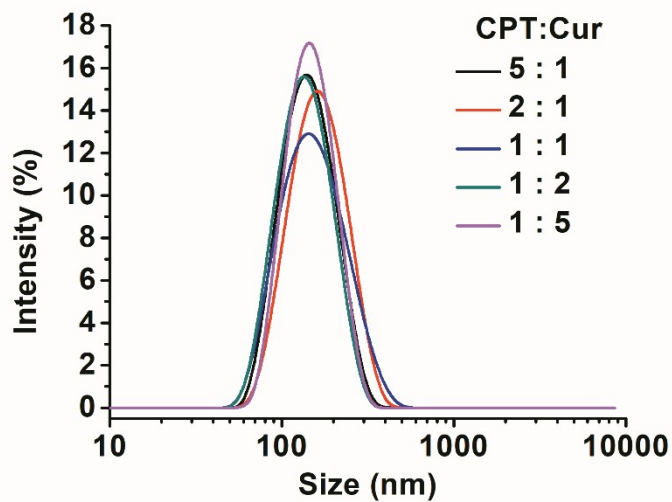

103  
 104 Fig.S5 Size distribution of CPT-etcSS-OA/Cur-etcSS-OA nanoaggregates (CPT-Cur-NAs) at  
 105 various CPT-etcSS-OA/Cur-etcSS-OA ratios (mole/mole).

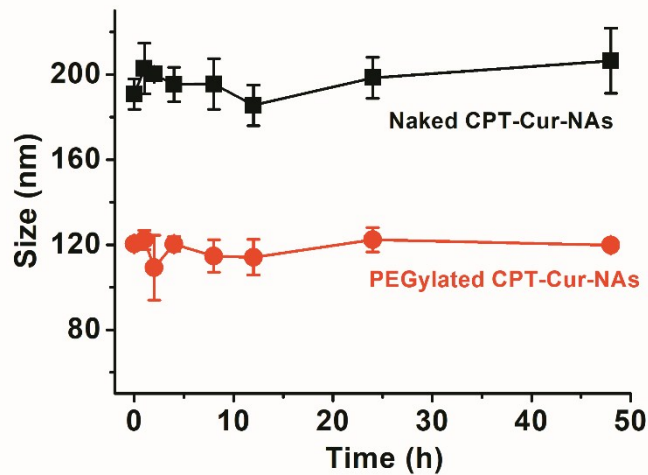

106  
 107 Fig.S6 Particle size of naked CPT-Cur-NAs and PEGylated CPT-Cur-NAs prepared at CPT  
 108 /Cur ratio of 1/2 in water stored at 37 °C for 48 h, [means  $\pm$  SD, n = 3].  
 109

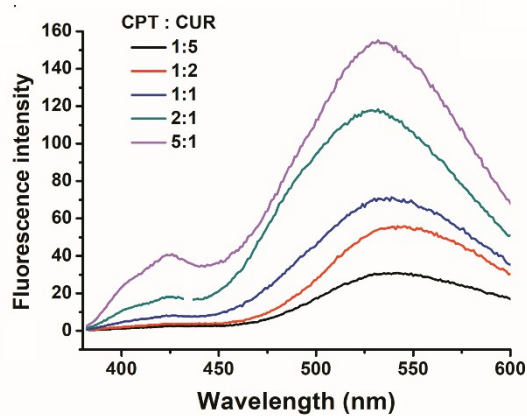

110  
 111 Fig.S7 Effects of the CPT-etcSS-OA/Cur-etcSS-OA ratio on the emission spectra of CPT-Cur-  
 112 NAs excited at 362 nm.

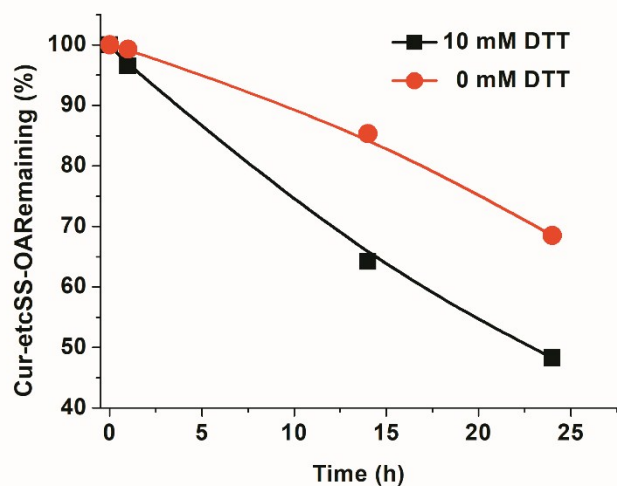

113  
 114 Fig.S8 Degradation of Cur-etcSS-OA with or without 10 mM DTT in 10 mM PB (pH 7.4) at 37 °C.  
 115

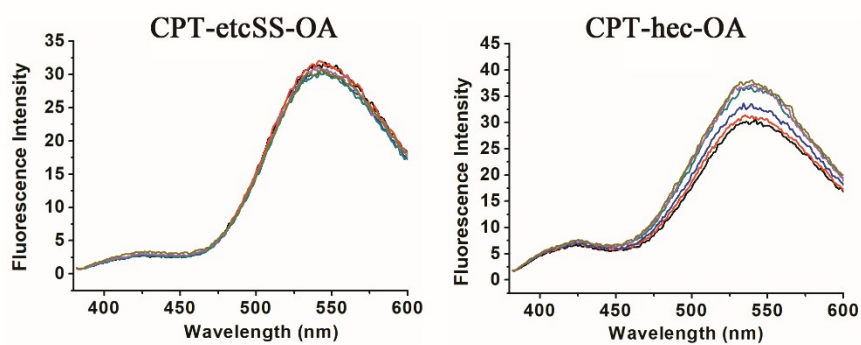

116  
 117 Fig.S9 kinetic change of emission spectra excited at 362 nm in 10 mM PB (pH 7.4) at 37 °C for  
 118 CPT-Cur-NAs of CPT-etcSS-OA and CPT-hec-OA.

119  
 120 **Reference**

121 1. Y. Li, T. Kang, Y. Wu, Y. Chen, J. Zhu and M. Gou, *Chem. Commun.*, 2018, **54**, 1996-1999.

122
